# Supplementary material
Source: PubMed Central journal article supplement (PMC4221550)

# Supplemental Figure 1.

**a.**

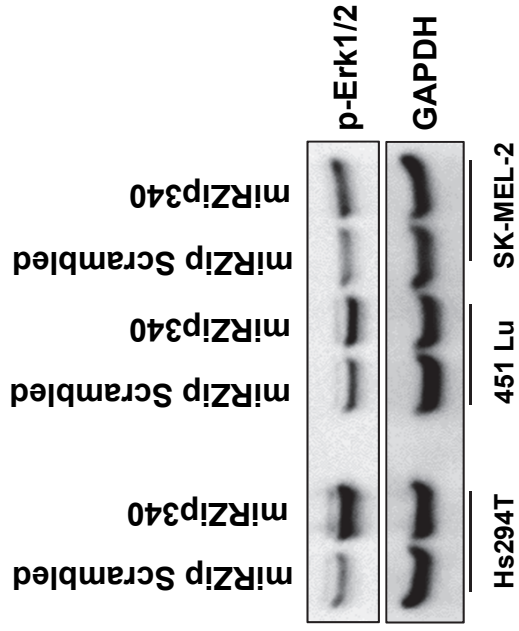

**b.**

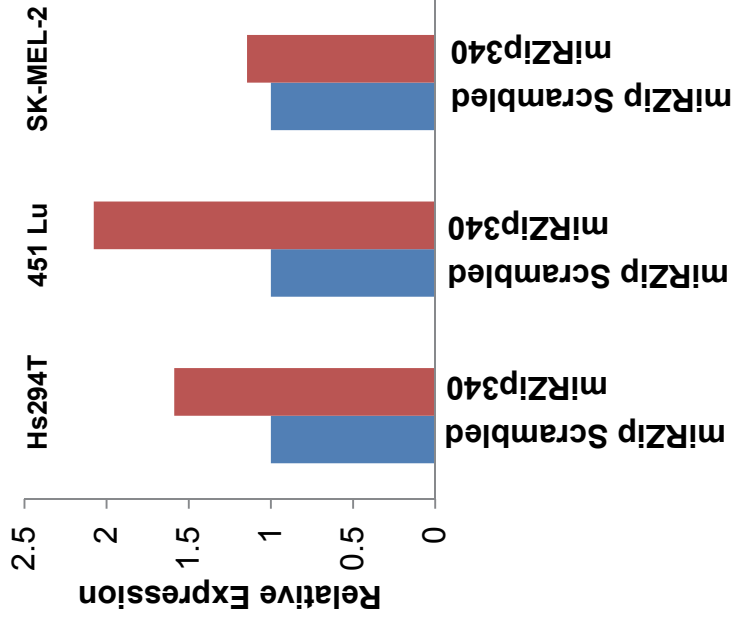

Supplement: NIHMS615007-supplement-02.pdf [file NIHMS615007-supplement-02.pdf]
